# Supplementary material for: Multi-Scale In Vivo Systems Analysis Reveals the Influence of Immune Cells on TNF-α-Induced Apoptosis in the Intestinal Epithelium
Source: PubMed Central journal article supplement (PMC3463506; doi:10.1371/journal.pbio.1001393), 2012-09-25
Supplement: pbio.1001393.s002.pdf [file pbio.1001393.s002.pdf]

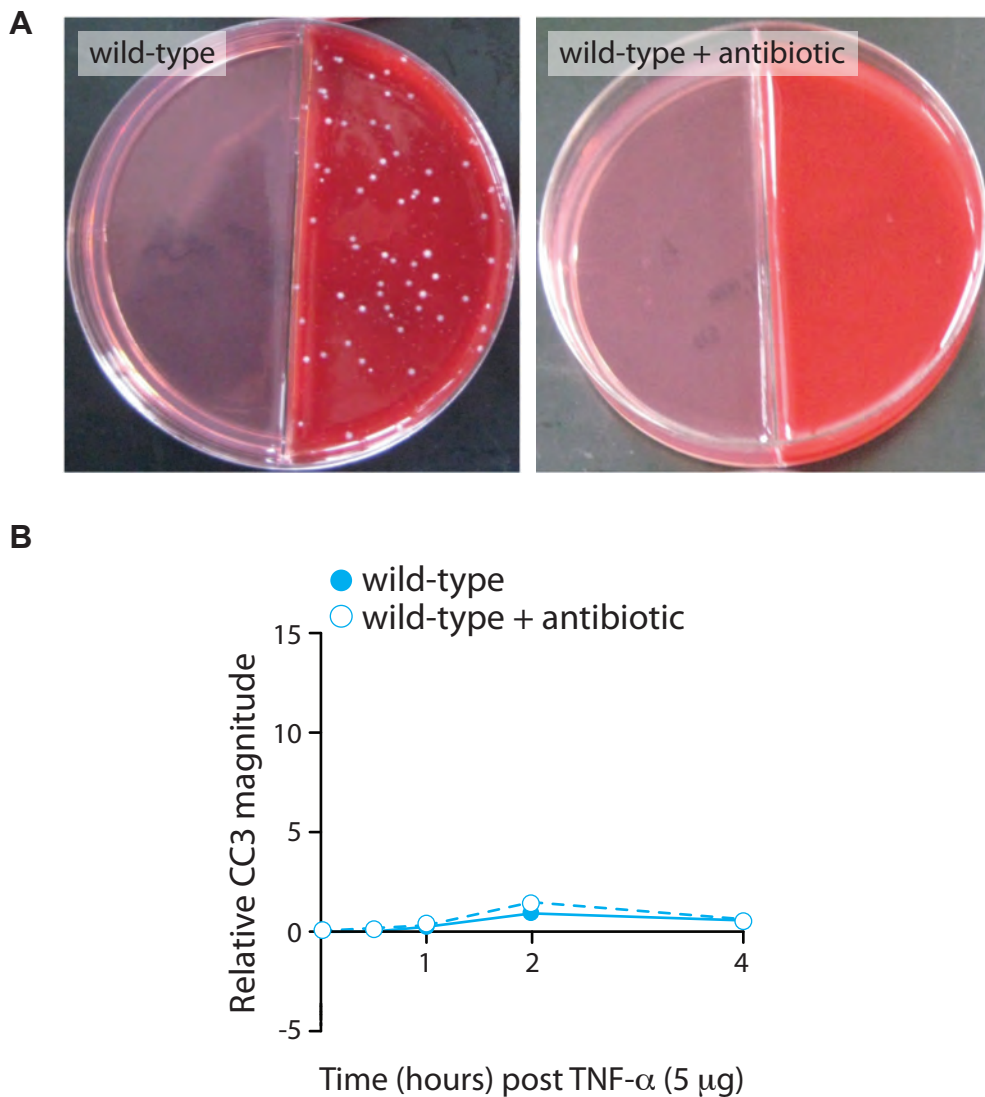

**Figure S2. Acute TNF- $\alpha$ -induced apoptosis in the intestine is not affected by modulation of the microbiota.** (A) Fecal flora of wild-type mice on normal drinking water or on drinking water supplemented with broad spectrum antibiotics (200  $\mu$ g/ml ampicillin, 50  $\mu$ g/ml Primaxin) for 10 days. Fecal flora were plated on MacConkey agar (pink) and Rose agar (red). (B) Time course of caspase 3 cleavage induced by TNF- $\alpha$  as determined by quantitative western blotting in the duodena of wild-type mice after antibiotic treatment above (broken line) or normal drinking water (solid line). Data are normalized to the peak signal of the wild-type control. Error bars represent the SEM for 3 mice.
