# Supplementary material for: Multi-Scale In Vivo Systems Analysis Reveals the Influence of Immune Cells on TNF-α-Induced Apoptosis in the Intestinal Epithelium
Source: PubMed Central journal article supplement (PMC3463506; doi:10.1371/journal.pbio.1001393), 2012-09-25
Supplement: pbio.1001393.s006.pdf [file pbio.1001393.s006.pdf]

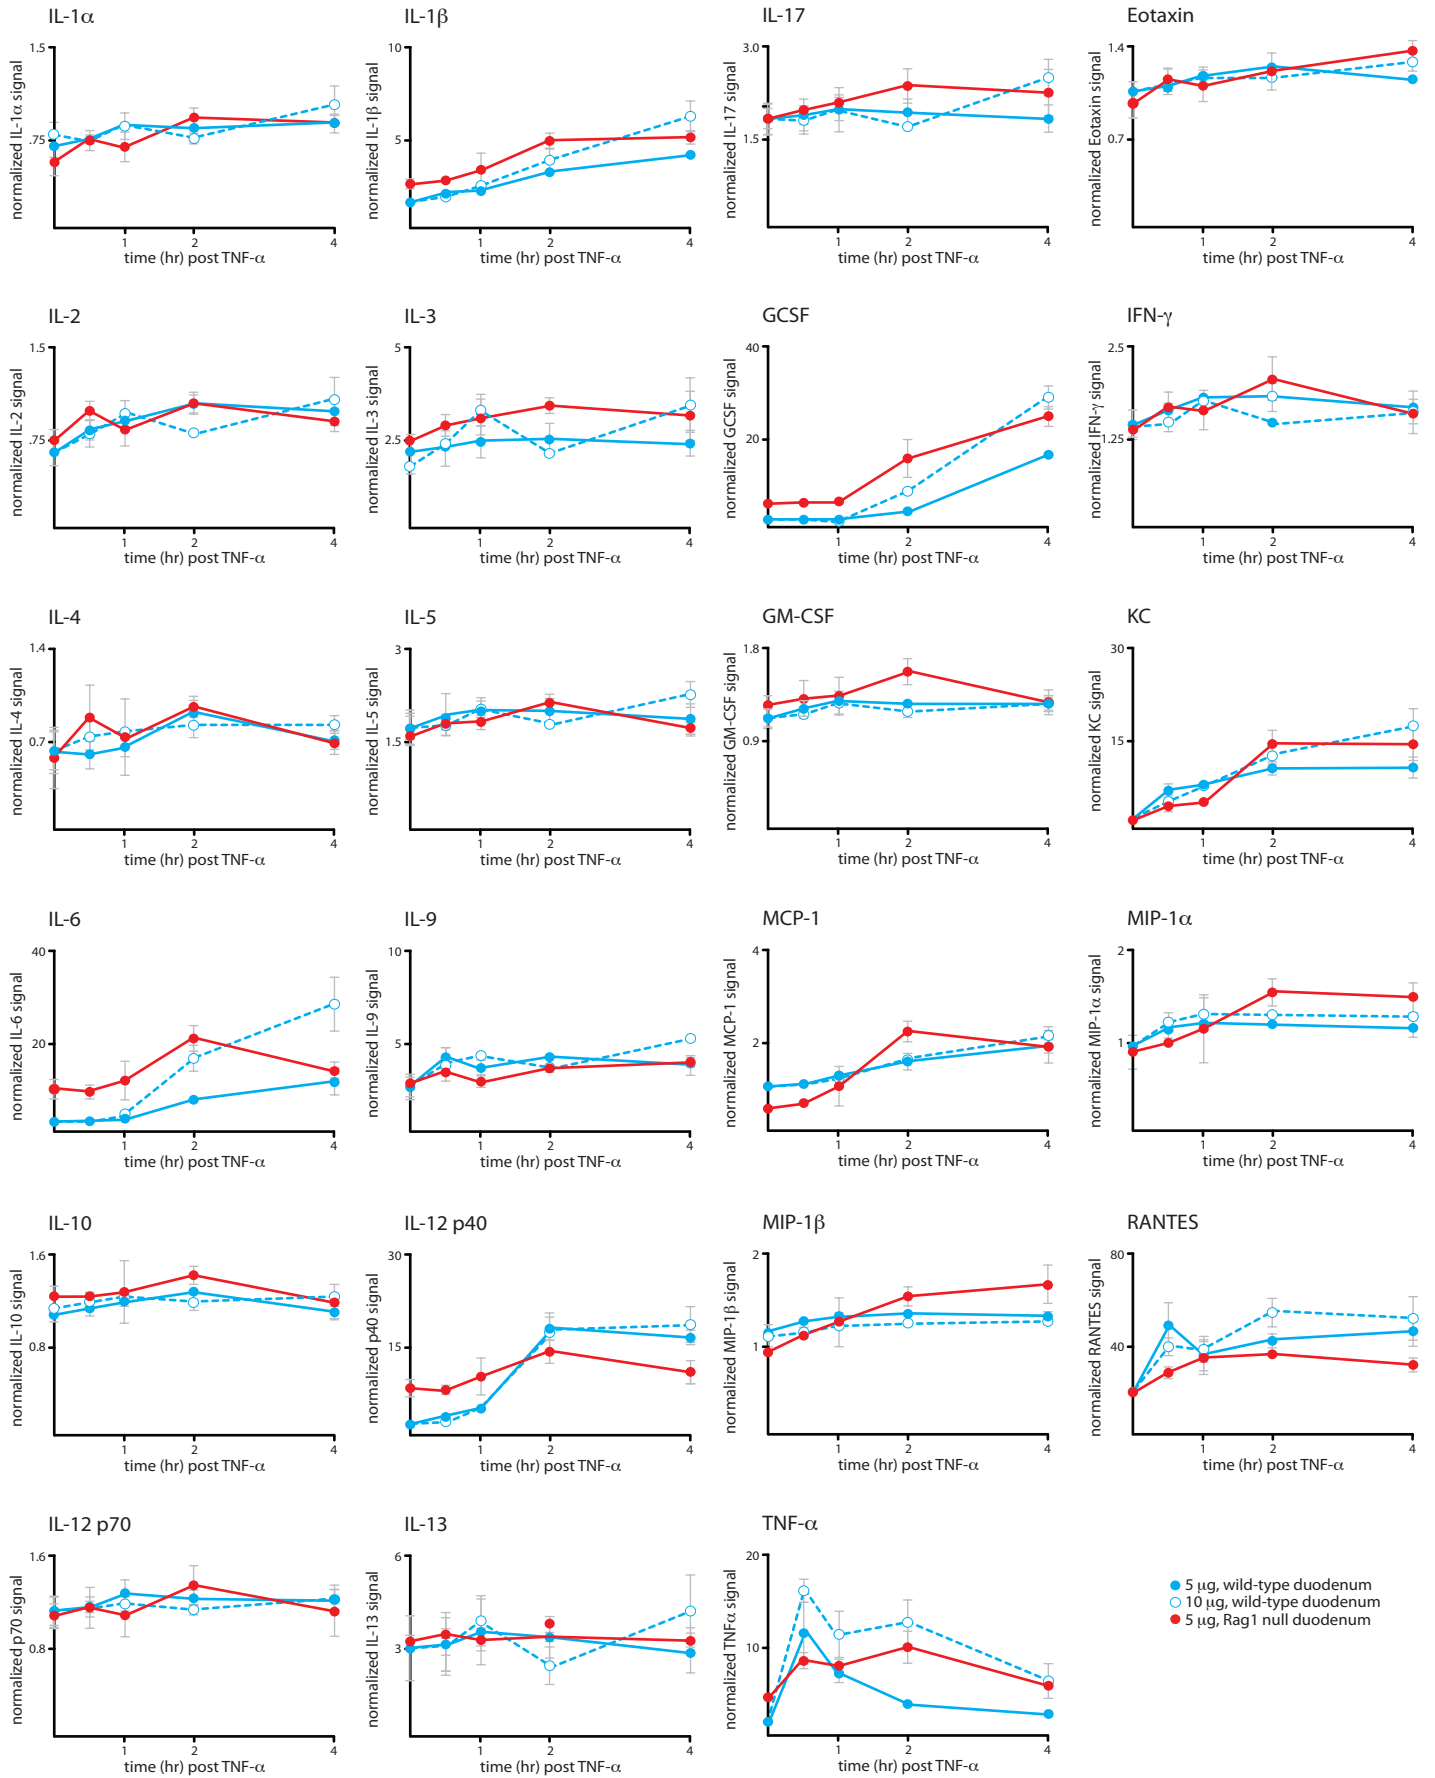

**Figure S6. Time courses of cytokine protein expression after administration of TNF- $\alpha$  *in vivo*.** Data points are the means of the median fluorescent intensities resulting from the cytokine assays performed on duodenal lysates, normalized to a loading control dataset on each plate. The color scheme is based on genotype (cyan for wild-type, red for Rag1 null), while the solid and broken lines represent low (5  $\mu$ g) and high (10  $\mu$ g) doses of TNF- $\alpha$ , respectively. Error bars represent SEM for 3 mice.
