# Supplementary material for: Multi-Scale In Vivo Systems Analysis Reveals the Influence of Immune Cells on TNF-α-Induced Apoptosis in the Intestinal Epithelium
Source: PubMed Central journal article supplement (PMC3463506; doi:10.1371/journal.pbio.1001393), 2012-09-25
Supplement: pbio.1001393.s009.pdf [file pbio.1001393.s009.pdf]

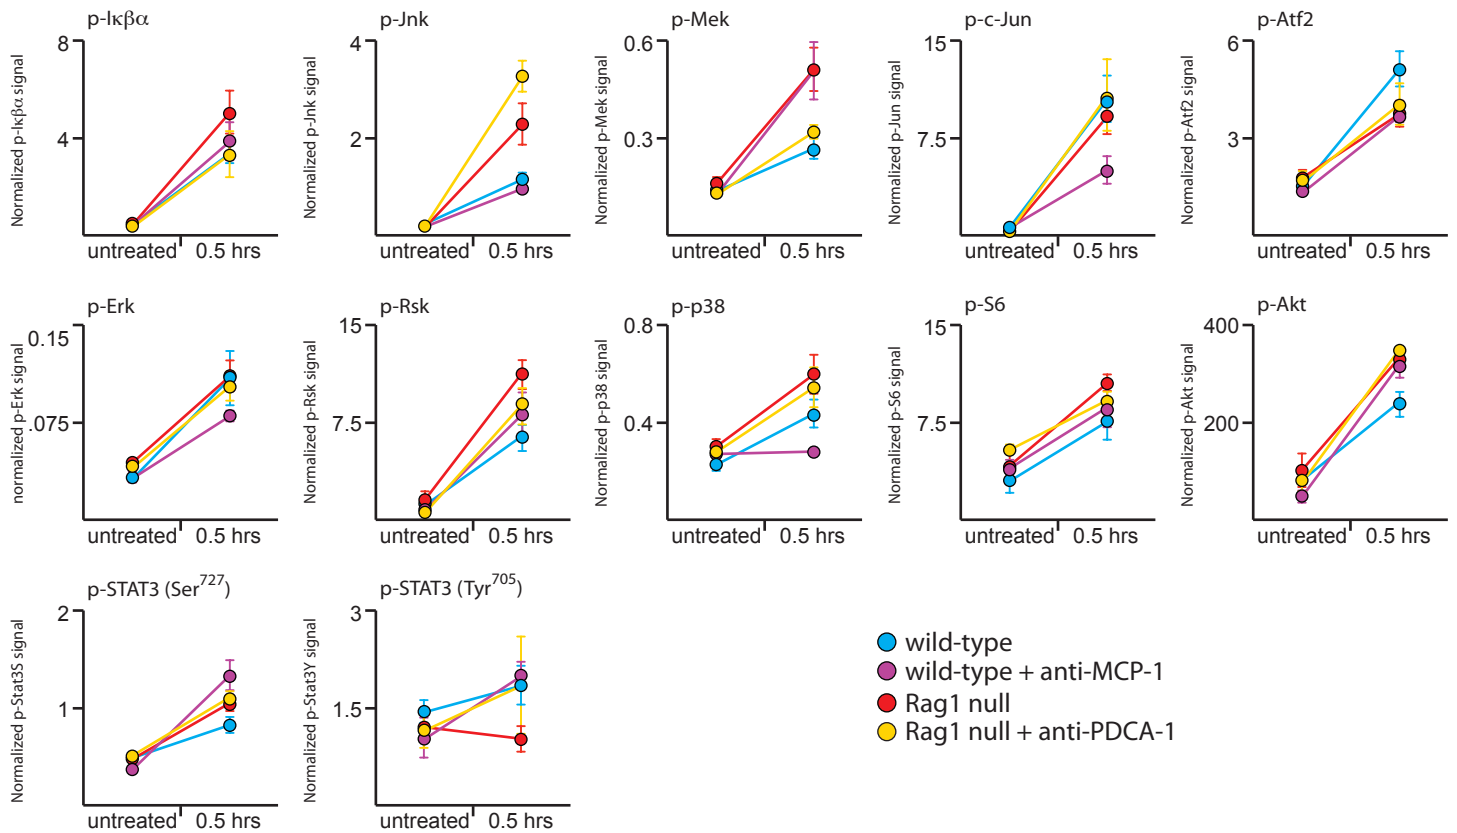

**Figure S9. Early TNF- $\alpha$ -induced signaling is modulated by plasmacytoid dendritic cells.**

Early signaling (0.5 h) induced by TNF- $\alpha$  in the duodenum as measured by Bio-Plex phosphoprotein signal assays for wild-type mice (cyan), wild-type mice pretreated with anti-MCP-1 for 2 hours (magenta), Rag1 null mice (red), and Rag1 null mice pretreated with anti-PDCA-1 for 2 days (yellow). Data are normalized to a loading control dataset on each plate. Error bars represent SEM for 3 mice.
